# Supplementary material for: In vivoandIn vitroproperties evaluation of curcumin loaded MgO doped 3D printed TCP scaffolds
Source: Royal Society of Chemistry journal article supplement (doi:10.1039/d2tb02547g), 2023-01-01
Supplement: d2tb02547g1.pdf [file d2tb02547g1.pdf]

***In vivo* and *In vitro* properties evaluation of curcumin loaded MgO doped 3D printed TCP scaffolds**

**Arjak Bhattacharjee, Yongdeok Jo, and Susmita Bose**

W. M. Keck Biomedical Materials Research Laboratory

School of Mechanical and Materials Engineering

Washington State University, Pullman, Washington 99164, USA

\*Corresponding author email: [sbose@wsu.edu](mailto:sbose@wsu.edu);

**Supplementary information**

**Table S1: values of parameters obtained from the Weibull model fit of 24 h release kinetics data (Figs. 1c, e and equation 1)**

| <b>pH</b> | <b>Sample</b> | <b>a</b> | <b>b</b> |
|-----------|---------------|----------|----------|
| 7.4       | TCP-Cur       | 3.5      | 1.2      |
| 7.4       | Mg-TCP-Cur    | 3.4      | 1.6      |
| 5.0       | TCP-Cur       | 6.9      | 3.8      |
| 5.0       | Mg-TCP-Cur    | 6.7      | 5.0      |

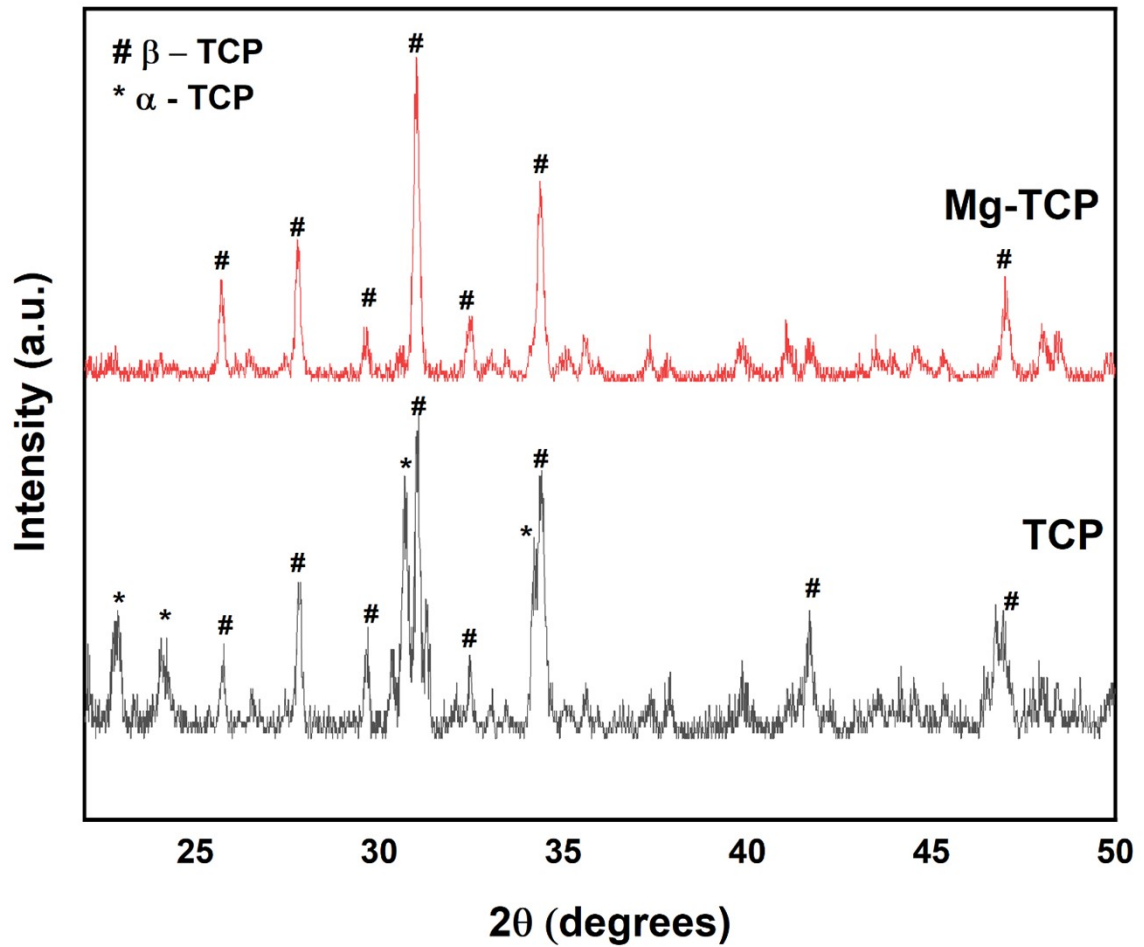

**Fig. S1:** XRD results of TCP indicate predominantly  $\beta$  - TCP (JCPDS # 09-0169) phases after sintering with some  $\alpha$  - TCP (JCPDS # 09-0348) phases. The Mg-TCP sample shows only  $\beta$  - TCP phase.

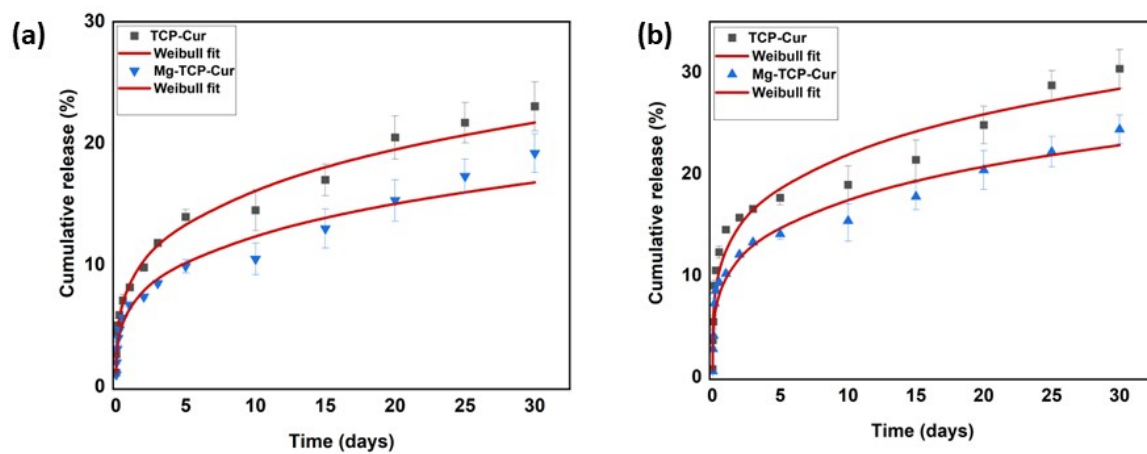

**Fig. S2:** Weibull fitting of obtained drug release data after 30 days of release (a) at pH 7.4 (b) at pH 5.0.

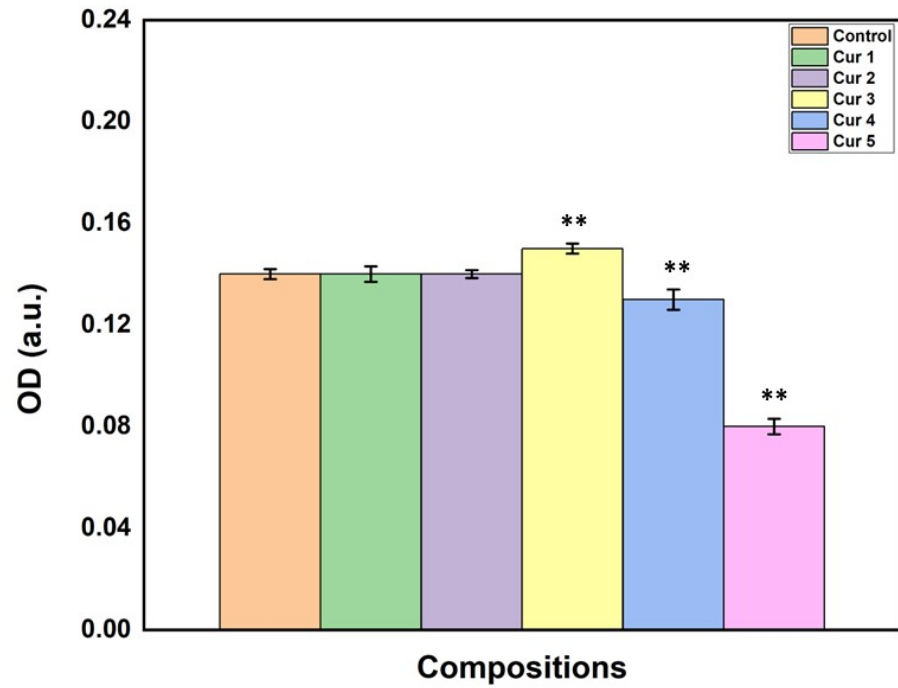

**Fig. S3:** MTT assay results after interaction with different amounts of curcumin-loaded scaffolds and osteoblast on day 5 show that the Cur 3 sample shows a significant increase in cellular viability, which decreases for the compositions Cur 4 and Cur 5.

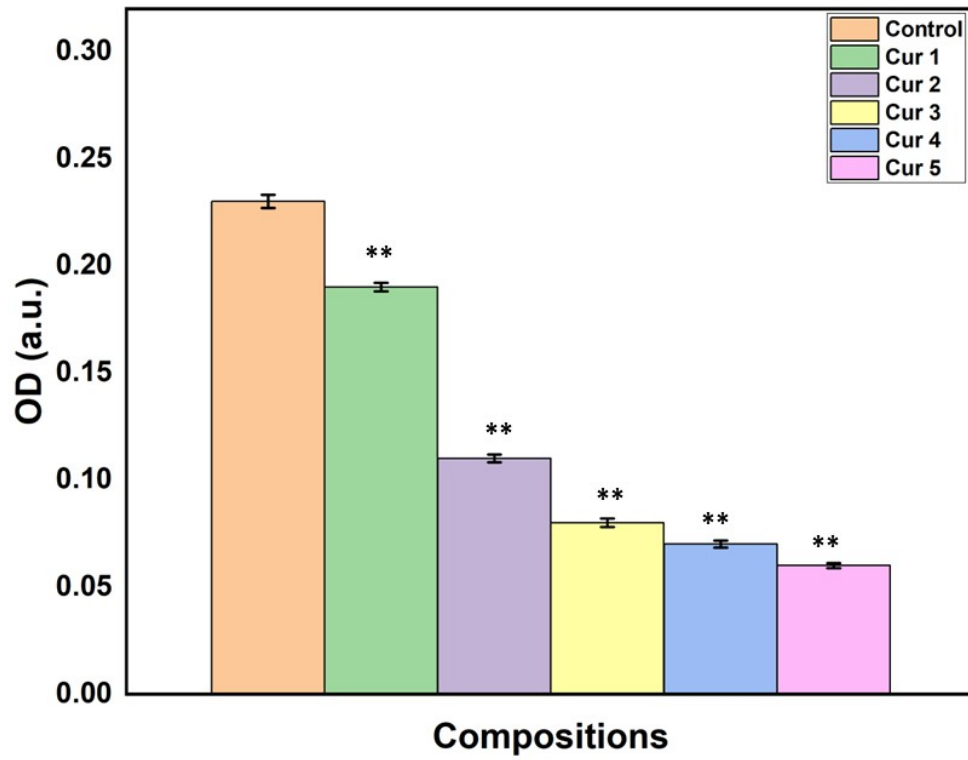

**Fig. S4:** MTT assay results after interaction of osteosarcoma with different amounts of curcumin-loaded scaffolds show that the presence of curcumin leads to a significant reduction in osteosarcoma cell viability on day 5.
